# Supplementary material
Source: PubMed Central journal article supplement (PMC3264664)
Supplement: NIHMS344736-supplement-1_si_001.pdf [file NIHMS344736-supplement-1_si_001.pdf]

## Supporting Information

# Protein conformational gating of enzymatic activity in xanthine oxidoreductase

Hiroshi Ishikita, Bryan T. Eger, Ken Okamoto, Takeshi Nishino and Emil F. Pai

### Reference 27:

Frisch, M. J.; Trucks, G. W.; Schlegel, H. B.; Scuseria, G. E.; Robb, M. A.; Cheeseman, J. R.; Montgomery, J. A., Jr.; Vreven, T.; Kudin, K. N.; Burant, J. C.; Millam, J. M.; Iyengar, S. S.; Tomasi, J.; Barone, V.; Mennucci, B.; Cossi, M.; Scalmani, G.; Rega, N.; Petersson, G. A.; Nakatsuji, H.; Hada, M.; Ehara, M.; Toyota, K.; Fukuda, R.; Hasegawa, J.; Ishida, M.; Nakajima, T.; Honda, Y.; Kitao, O.; Nakai, H.; Klene, M.; Li, X.; Knox, J. E.; Hratchian, H. P.; Cross, J. B.; Adamo, C.; Jaramillo, J.; Gomperts, R.; Stratmann, R. E.; Yazyev, O.; Austin, A. J.; Cammi, R.; Pomelli, C.; Ochterski, J. W.; Ayala, P. Y.; Morokuma, K.; Voth, G. A.; Salvador, P.; Dannenberg, J. J.; Zakrzewski, V. G.; Dapprich, S.; Daniels, A. D.; Strain, M. C.; Farkas, O.; Malick, D. K.; Rabuck, A. D.; Raghavachari, K.; Foresman, J. B.; Ortiz, J. V.; Cui, Q.; Baboul, A. G.; Clifford, S.; Cioslowski, J.; Stefanov, B. B.; Liu, G.; Liashenko, A.; Piskorz, P.; Komaromi, I.; Martin, R. L.; Fox, D. J.; Keith, T.; Al-Laham, M. A.; Peng, C. Y.; Nanayakkara, A.; Challacombe, M.; Gill, P. M. W.; Johnson, B.; Chen, W.; Wong, M. W.; Gonzalez, C.; Pople, J. A. *Gaussian 03*, revision C.03; Gaussian, Inc.: Pittsburgh, PA, 2003.

**Evaluation of the protein dielectric constant  $\epsilon_p$ .** The optimal  $\epsilon_p$  value depends on the protein model used. The more atomic details are included explicitly in the description of the molecular system, the lower the  $\epsilon_p$  value becomes. The  $\epsilon_p$  size is a reflection of what is not included explicitly (e.g.,  $\epsilon_p = 1$  for the system with all the possible factors influencing electrostatic interactions being considered explicitly) (1,2). As demonstrated by Warshel and coworkers (1,2)  $\epsilon_p \approx 4$  can be used when protein flexibility is taken into account explicitly. Furthermore, it is unlikely that the  $\epsilon_p$  for charge-dipole and charge-charge interactions are identical (1). It has been suggested that  $\epsilon_p \approx 20$  and 40 should be used for interactions of charged-uncharged groups and charged-charged groups, respectively (1,3).

In the present study, we do not consider flexibility of protein structure explicitly. However, we consider protonation states of all titratable sites in the whole protein explicitly, i.e., the flexibility of protein charge where all the titratable sites are simultaneously equilibrated. It is important to note that the protonation states of the titratable groups are modulated in response to the flavin redox state. Hence, the  $\epsilon_p$  value in the present study could be lower than that used in other studies, in which changes of atomic charges as a consequence of titration are not modeled explicitly. Based on a number of studies, we obtained best results for the redox potential values for redox-active groups (e.g. flavin (4-6), chlorophyll (7), pheophytin (8), heme (9), and tyrosine (10)) and  $pK_a$  values for titratable groups (11-14) in a number of proteins, using a dielectric constant of  $\epsilon_p = 4$  inside the protein. Hence,  $\epsilon_p = 4$  appears to be optimal in the current computational model used in the present study.

**SUPPORTING REFERENCES**

1. Schutz, C. N., and Warshel, A. (2001) *Proteins* **44**, 400-417
2. Warshel, A., Sharma, P. K., Kato, M., and Parson, W. W. (2006) *Biochim. Biophys. Acta* **1764**, 1647-1676
3. Muegge, I., Tao, H., and Warshel, A. (1997) *Prot. Eng.* **10**, 1363-1372
4. Ishikita, H. (2007) *J. Biol. Chem.* **282**, 25240-25246
5. Ishikita, H. (2008) *Biochemistry* **47**, 4394-4402
6. Ishikita, H. (2008) *J. Biol. Chem.* **283**, 30618-30623
7. Ishikita, H., Saenger, W., Biesiadka, J., Loll, B., and Knapp, E.-W. (2006) *Proc. Natl. Acad. Sci. USA* **103**, 9855-9860
8. Ishikita, H., Biesiadka, J., Loll, B., Saenger, W., and Knapp, E. W. (2006) *Angew. Chem. Int. Ed. Engl.* **45**, 1964-1965
9. Ishikita, H., and Knapp, E.-W. (2005) *FEBS Lett.* **579**, 3190-3194
10. Ishikita, H., and Knapp, E. W. (2006) *Biophys. J.* **90**, 3886-3896
11. Ishikita, H., and Knapp, E.-W. (2005) *J. Biol. Chem.* **280**, 12446-12450
12. Ishikita, H., and Knapp, E.-W. (2005) *Proc. Natl. Acad. Sci. USA* **102**, 16215-16220
13. Ishikita, H., Saenger, W., Loll, B., Biesiadka, J., and Knapp, E.-W. (2006) *Biochemistry* **45**, 2063-2071
14. Ishikita, H., and Knapp, E.-W. (2007) *J. Am. Chem. Soc.* **129**, 1210-1215

**Table S1.** Atomic partial charges of titratable phosphoacid (the proximal and distal phosphate sites in the pyrophosphate region) of FAD and NAD.

| <b>atom</b> | <b>protonated</b> | <b>deprotonated</b> |
|-------------|-------------------|---------------------|
| P           | 1.43              | 1.27                |
| O1          | -0.42             | -0.84               |
| O2          | -0.42             | -0.84               |

**Table S2.** Atomic partial charges of the molybdopterin center.

| <b>atom</b> | <b>Mo(VI)</b> |
|-------------|---------------|
| N1          | -0.66         |
| C2          | 0.79          |
| N2          | -0.78         |
| H2A         | 0.31          |
| H2B         | 0.31          |
| N3          | -0.80         |
| H3          | 0.41          |
| C4          | 0.72          |
| O4          | -0.57         |
| N5          | -0.44         |
| H5          | 0.30          |
| C6          | 0.13          |
| C7          | 0.12          |
| N8          | -0.39         |
| H8          | 0.29          |
| C9          | -0.17         |
| C10         | 0.43          |
| C1'         | -0.03         |
| S1'         | -0.27         |
| C2'         | -0.04         |
| S2'         | -0.44         |
| C3'         | 0.22          |
| O3'         | -0.28         |
| MO          | 0.87          |
| S           | -0.43         |
| O1          | -0.59         |
| HO1         | 0.35          |
| O2          | -0.36         |

**Table S3.** Atomic partial charges of NAD<sup>+</sup>/NADH.

|     | <b>NAD<sup>+</sup></b> | <b>NADH</b> |
|-----|------------------------|-------------|
| N1  | 0.37                   | 0.03        |
| C6  | -0.04                  | -0.13       |
| H6  | 0.18                   | 0.15        |
| C5  | -0.1                   | -0.23       |
| H5  | 0.18                   | 0.10        |
| C4  | 0.04                   | 0.24        |
| H4  | 0.00                   | 0.00        |
| H42 | 0.00                   | 0.00        |
| H4D | 0.16                   | 0.00        |
| C3  | -0.16                  | -0.27       |
| C2  | 0.02                   | -0.03       |
| H2  | 0.15                   | 0.11        |
| C7  | 0.66                   | 0.64        |
| O7  | -0.44                  | -0.52       |
| N7  | -0.84                  | -0.83       |
| H71 | 0.41                   | 0.37        |
| H72 | 0.41                   | 0.37        |

**Table S4** (a) Protein components differentiating the  $E_{\text{sq/hq}}$  value for XDH/XO in mV. Protein components that increase/decrease the  $E_{\text{sq/hq}}$  difference by  $\geq 20$  mV are listed. For clarity, other residues are omitted from the table.

|                                                      | $E_{\text{sq/hq}}(\text{XDH})$ |                   |       | $E_{\text{sq/hq}}(\text{XO})$ |                   |       | Difference ( $\Delta E_{\text{sq/hq}}$ ) <sup>a</sup> |                   |       | location          |
|------------------------------------------------------|--------------------------------|-------------------|-------|-------------------------------|-------------------|-------|-------------------------------------------------------|-------------------|-------|-------------------|
|                                                      | side. <sup>b</sup>             | b.b. <sup>c</sup> | total | side. <sup>b</sup>            | b.b. <sup>c</sup> | total | side. <sup>b</sup>                                    | b.b. <sup>c</sup> | total |                   |
| main components increasing $\Delta E_{\text{sq/hq}}$ |                                |                   |       |                               |                   |       |                                                       |                   |       |                   |
| Lys433                                               | 40                             | 0                 | 40    | 154                           | -2                | 152   | -114                                                  | 2                 | -112  | loop <sup>d</sup> |
| Glu263                                               | -174                           | -3                | -177  | -101                          | -3                | -104  | -73                                                   | 0                 | -73   |                   |
| Asp429                                               | -151                           | 14                | -137  | -53                           | -13               | -66   | -98                                                   | 27                | -71   | loop <sup>d</sup> |
| Asp430                                               | -83                            | -25               | -108  | -44                           | -2                | -46   | -39                                                   | -23               | -62   | loop <sup>d</sup> |
| Asp360                                               | -275                           | 39                | -236  | -230                          | 40                | -190  | -45                                                   | -1                | -46   |                   |
| Arg426                                               | 92                             | -4                | 88    | 126                           | -1                | 125   | -34                                                   | -3                | -37   | loop <sup>d</sup> |
| Asn71                                                | -16                            | 2                 | -14   | 13                            | 2                 | 15    | -29                                                   | 0                 | -29   |                   |
| Glu267                                               | -35                            | 3                 | -32   | -13                           | 3                 | -10   | -22                                                   | 0                 | -22   |                   |
| FeS-II <sup>e</sup>                                  |                                |                   | -151  |                               |                   | -129  |                                                       |                   | -22   |                   |
| Gln144                                               | -8                             | -6                | -14   | 12                            | -5                | 7     | -20                                                   | -1                | -21   |                   |
| main components decreasing $\Delta E_{\text{sq/hq}}$ |                                |                   |       |                               |                   |       |                                                       |                   |       |                   |
| Lys422                                               | 257                            | 4                 | 261   | 152                           | 3                 | 155   | 105                                                   | 1                 | 106   | loop <sup>d</sup> |
| P (proximal) <sup>f</sup>                            |                                |                   | 14    |                               |                   | -81   |                                                       |                   | 95    |                   |
| Lys1228                                              | 124                            | 3                 | 127   | 76                            | 4                 | 80    | 48                                                    | -1                | 47    |                   |
| Lys271                                               | 52                             | 1                 | 53    | 20                            | 2                 | 22    | 32                                                    | -1                | 31    |                   |
| Lys343                                               | 86                             | 4                 | 90    | 64                            | 3                 | 67    | 22                                                    | 1                 | 23    |                   |
| Ala338                                               | 3                              | 27                | 30    | 5                             | 5                 | 10    | -2                                                    | 22                | 20    |                   |

<sup>a</sup> $E_{\text{sq/hq}}(\text{XDH}) - E_{\text{sq/hq}}(\text{XO})$ .

<sup>b</sup>Side chain.

<sup>c</sup>Backbone.

<sup>d</sup>The loop region (Gln423–Lys433) close to the flavin ring<sup>5</sup>.

<sup>e</sup>The iron-sulfur cluster proximal to the flavin ring.

<sup>f</sup>A phosphate titratable site of the FAD diphosphate region proximal to the flavin ring.

(b) Influence of the atomic charges of residues in the 423-433 loop (including Lys422) on the  $E_{\text{sq/hq}}$  value for XDH/XO in mV.

| residues | $E_{\text{sq/hq}}(\text{XDH})$ |                   |       | $E_{\text{sq/hq}}(\text{XO})$ |                   |       | Difference ( $\Delta E_{\text{sq/hq}}$ ) <sup>a</sup> |                   |       |
|----------|--------------------------------|-------------------|-------|-------------------------------|-------------------|-------|-------------------------------------------------------|-------------------|-------|
|          | side. <sup>b</sup>             | b.b. <sup>c</sup> | total | side. <sup>b</sup>            | b.b. <sup>c</sup> | total | side. <sup>b</sup>                                    | b.b. <sup>c</sup> | total |
| Lys422   | 257                            | 4                 | 261   | 152                           | 3                 | 155   | 105                                                   | 1                 | 106   |
| Gln423   | 0                              | -2                | -2    | 2                             | -7                | -5    | -2                                                    | 5                 | 3     |
| Ala424   | 1                              | 3                 | 4     | -1                            | 0                 | -1    | 2                                                     | 3                 | 5     |
| Ser425   | 1                              | 4                 | 5     | -1                            | 2                 | 1     | 2                                                     | 2                 | 4     |
| Arg426   | 92                             | -4                | 88    | 126                           | -1                | 125   | -34                                                   | -3                | -37   |
| Arg427   | 29                             | -8                | 21    | 21                            | 2                 | 23    | 8                                                     | -10               | -2    |
| Glu428   | -41                            | 2                 | -39   | -19                           | -7                | -26   | -22                                                   | 9                 | -13   |
| Asp429   | -151                           | 14                | -137  | -53                           | -13               | -66   | -98                                                   | 27                | -71   |
| Asp430   | -83                            | -25               | -108  | -44                           | -2                | -46   | -39                                                   | -23               | -62   |
| Ile431   | 9                              | 0                 | 9     | -6                            | 0                 | -6    | 15                                                    | 0                 | 15    |
| Ala432   | 1                              | 9                 | 10    | 0                             | -2                | -2    | 1                                                     | 11                | 12    |
| Lys433   | 40                             | 0                 | 40    | 154                           | -2                | 152   | -114                                                  | 2                 | -112  |
| total    | 155                            | -3                | 152   | 331                           | -27               | 304   | -176                                                  | 24                | -152  |

<sup>a</sup> $E_{\text{sq/hq}}(\text{XDH}) - E_{\text{sq/hq}}(\text{XO})$ .

<sup>b</sup>Side chain.

<sup>c</sup>Backbone.



**Table S5.**  $E_{\text{sq/hq}}$  for XDH; (a) protein components increasing the  $E_{\text{sq/hq}}$  value in response to  $\text{NAD}^+$  binding in mV. Protein components that increase/decrease the  $E_{\text{sq/hq}}$  difference by  $\geq 20$  mV are listed. For clarity, other residues are omitted from the table.

|                                             |                    |                   |       | with $\text{NAD}^+$ |                   |       | Difference <sup>a</sup> |                   |       |
|---------------------------------------------|--------------------|-------------------|-------|---------------------|-------------------|-------|-------------------------|-------------------|-------|
|                                             | side. <sup>b</sup> | b.b. <sup>c</sup> | total | side. <sup>b</sup>  | b.b. <sup>c</sup> | total | side. <sup>b</sup>      | b.b. <sup>c</sup> | total |
| $\text{NAD}^+$                              |                    |                   |       |                     |                   | 358   |                         |                   | 358   |
| Lys422                                      | 257                | 4                 | 261   | 318                 | 5                 | 323   | 61                      | 1                 | 62    |
| P ( $\text{NAD}^+$ , proximal) <sup>d</sup> |                    |                   |       |                     |                   | 36    |                         |                   | 36    |
| Arg394                                      | 56                 | 4                 | 60    | 83                  | 7                 | 90    | 27                      | 3                 | 30    |
| Lys343                                      | 86                 | 4                 | 90    | 108                 | 6                 | 114   | 22                      | 2                 | 24    |

<sup>a</sup> $E_{\text{sq/hq}}(\text{XDH with } \text{NAD}^+) - E_{\text{sq/hq}}(\text{XDH})$ .

<sup>b</sup>Side chain.

<sup>c</sup>Backbone.

<sup>d</sup>A phosphate titratable site of the  $\text{NAD}^+$  diphosphate region proximal to the nicotinamide ring.

(b) Protein components compensating for the  $E_{\text{sq/hq}}$  upshift in response to  $\text{NAD}^+$  binding in mV.

|                              |                    |                   |       | with $\text{NAD}^+$ |                   |       | Difference <sup>a</sup> |                   |       |
|------------------------------|--------------------|-------------------|-------|---------------------|-------------------|-------|-------------------------|-------------------|-------|
|                              | side. <sup>b</sup> | b.b. <sup>c</sup> | total | side. <sup>b</sup>  | b.b. <sup>c</sup> | total | side. <sup>b</sup>      | b.b. <sup>c</sup> | total |
| Asp429                       | -151               | 14                | -137  | -280                | 27                | -253  | -129                    | 13                | -116  |
| Glu263                       | -174               | -3                | -177  | -257                | 0                 | -257  | -83                     | 3                 | -80   |
| Asp360                       | -275               | 39                | -236  | -358                | 46                | -312  | -83                     | 7                 | -76   |
| FeS-II <sup>e</sup>          | -151               | 0                 | -151  | -183                | 0                 | -183  | -32                     | 0                 | -32   |
| Asp430                       | -83                | -25               | -108  | -103                | -31               | -134  | -20                     | -6                | -26   |
| P (FAD, distal) <sup>f</sup> | -75                | 0                 | -75   | -97                 | 0                 | -97   | -22                     | 0                 | -22   |

<sup>e</sup>The iron-sulfur cluster proximal to the flavin ring.

<sup>f</sup>A phosphate titratable site of the FAD diphosphate region distal to the flavin ring.

**Table S6.** Protein components differentiating the  $pK_a(N5)$  value for  $FADH^\bullet/FAD^{\bullet-}$  in  $pK_a$ . Protein components that increase/decrease the  $pK_a(N5)$  difference by  $\geq 0.4$  are listed.

|                                                                    | XDH                |                   |       | XO                 |                   |       | Difference <sup>a</sup> |                   |       |
|--------------------------------------------------------------------|--------------------|-------------------|-------|--------------------|-------------------|-------|-------------------------|-------------------|-------|
|                                                                    | side. <sup>b</sup> | b.b. <sup>c</sup> | total | side. <sup>b</sup> | b.b. <sup>c</sup> | total | side. <sup>b</sup>      | b.b. <sup>c</sup> | total |
| <b>increasing the <math>pK_a(N5)</math> difference<sup>a</sup></b> |                    |                   |       |                    |                   |       |                         |                   |       |
| Lys433                                                             | -0.7               | 0                 | -0.7  | -2.5               | 0                 | -2.5  | 1.8                     | 0                 | 1.8   |
| Asp430                                                             | 1.5                | 0.5               | 2.0   | 0.7                | 0                 | 0.7   | 0.8                     | 0.5               | 1.3   |
| Asp429                                                             | 2.6                | -0.4              | 2.2   | 0.8                | 0.2               | 1.0   | 1.8                     | -0.6              | 1.2   |
| Glu263                                                             | 2.7                | 0                 | 2.7   | 1.6                | 0                 | 1.6   | 1.1                     | 0                 | 1.1   |
| Asp360                                                             | 4.3                | -0.6              | 3.7   | 3.5                | -0.6              | 2.9   | 0.8                     | 0                 | 0.8   |
| Asn71                                                              | 0.3                | 0                 | 0.3   | -0.2               | 0                 | -0.2  | 0.5                     | 0                 | 0.5   |
| Gln144                                                             | 0.2                | 0.1               | 0.3   | -0.2               | 0.1               | -0.1  | 0.4                     | 0                 | 0.4   |
| Arg426                                                             | -1.8               | 0.1               | -1.7  | -2.1               | 0                 | -2.1  | 0.3                     | 0.1               | 0.4   |
| FeS-II <sup>d</sup>                                                |                    |                   | 2.6   |                    |                   | 2.2   |                         |                   | 0.4   |
| <b>decreasing the <math>pK_a(N5)</math> difference<sup>a</sup></b> |                    |                   |       |                    |                   |       |                         |                   |       |
| Lys422                                                             | -4.3               | -0.1              | -4.4  | -2.5               | -0.1              | -2.6  | -1.8                    | 0                 | -1.8  |
| P (proximal) <sup>e</sup>                                          |                    |                   | -0.2  |                    |                   | 1.3   |                         |                   | -1.5  |
| Lys1228                                                            | -2.3               | -0.1              | -2.4  | -1.4               | -0.1              | -1.5  | -0.9                    | 0                 | -0.9  |
| Lys271                                                             | -0.9               | 0                 | -0.9  | -0.3               | 0                 | -0.3  | -0.6                    | 0                 | -0.6  |
| Ala338                                                             | 0                  | -0.8              | -0.8  | -0.1               | -0.1              | -0.2  | 0.1                     | -0.7              | -0.6  |
| Lys343                                                             | -1.6               | -0.1              | -1.7  | -1.1               | -0.1              | -1.2  | -0.5                    | 0                 | -0.5  |

<sup>a</sup> $pK_a(XDH) - pK_a(XO)$ . A positive value here indicates an increased difference between  $pK_a(N5)$  in the two enzymes, while a negative value indicates a decreased difference.

<sup>b</sup>Side chain.

<sup>c</sup>Backbone.

<sup>d</sup>The iron-sulfur cluster proximal to the flavin ring.

<sup>e</sup>A phosphate titratable site of the FAD pyrophosphate part proximal to the flavin ring.
